# Supplementary material for: Highly fluorescent nitrogen and boron doped carbon quantum dots for selective and sensitive detection of Fe3+
Source: Royal Society of Chemistry journal article supplement (doi:10.1039/d1tb00371b), 2021-01-01
Supplement: d1tb00371b1.pdf [file d1tb00371b1.pdf]

Electronic supporting information

## Highly Fluorescent Nitrogen and Boron Doped Carbon Quantum Dots for Selective and Sensitive Detection of Fe<sup>3+</sup>

Yunhao Zhang<sup>a, ‡</sup>, Hongxin Qin<sup>a, ‡</sup>, Yuting Huang<sup>a</sup>, Feng Zhang<sup>a</sup>, Hairong Liu<sup>a</sup>, Hongbo Liu<sup>a, b</sup>, Zijun Wang<sup>c</sup>, Run Li<sup>\*, a, b</sup>

<sup>a</sup> College of Material Science and Engineering, Hunan University, Hunan, Changsha 410082, China

<sup>b</sup> Hunan Province Key Laboratory for Advanced Carbon Materials and Applied Technology, Hunan University, Hunan, Changsha 410082, China.

<sup>c</sup> Max Planck Institute for Polymer Research, Ackermannweg 10, 55128 Mainz, Germany.

E-mail: lirun@hnu.edu.cn

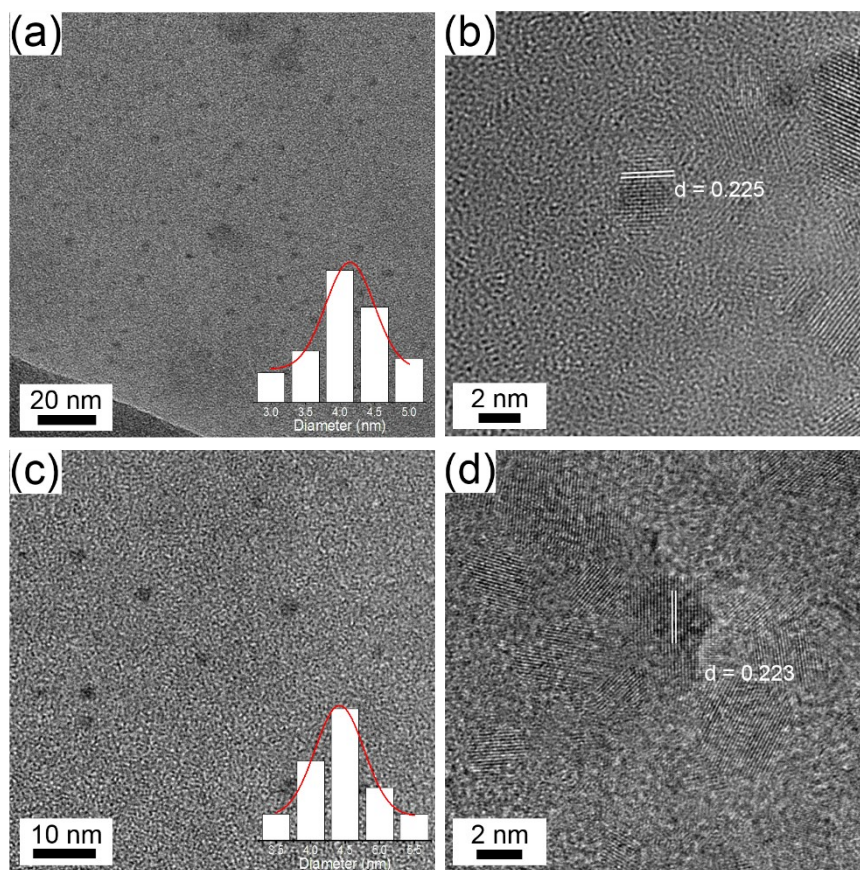

**Fig. S1** TEM and high resolution-TEM images of BNCQD (a, b) and NCQD (c, d). Insert of (a) and (c) are the corresponding size distribution.

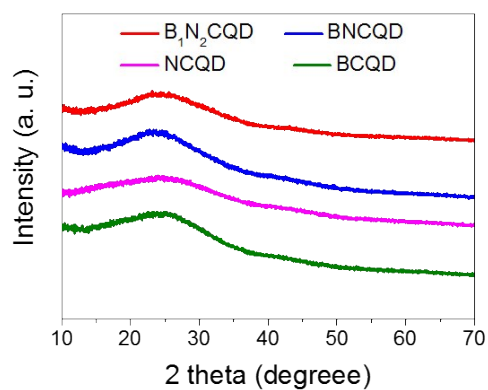

**Fig. S2** XRD patterns of  $B_1N_2CQD$ , BNCQD, NCQD and BCQD.

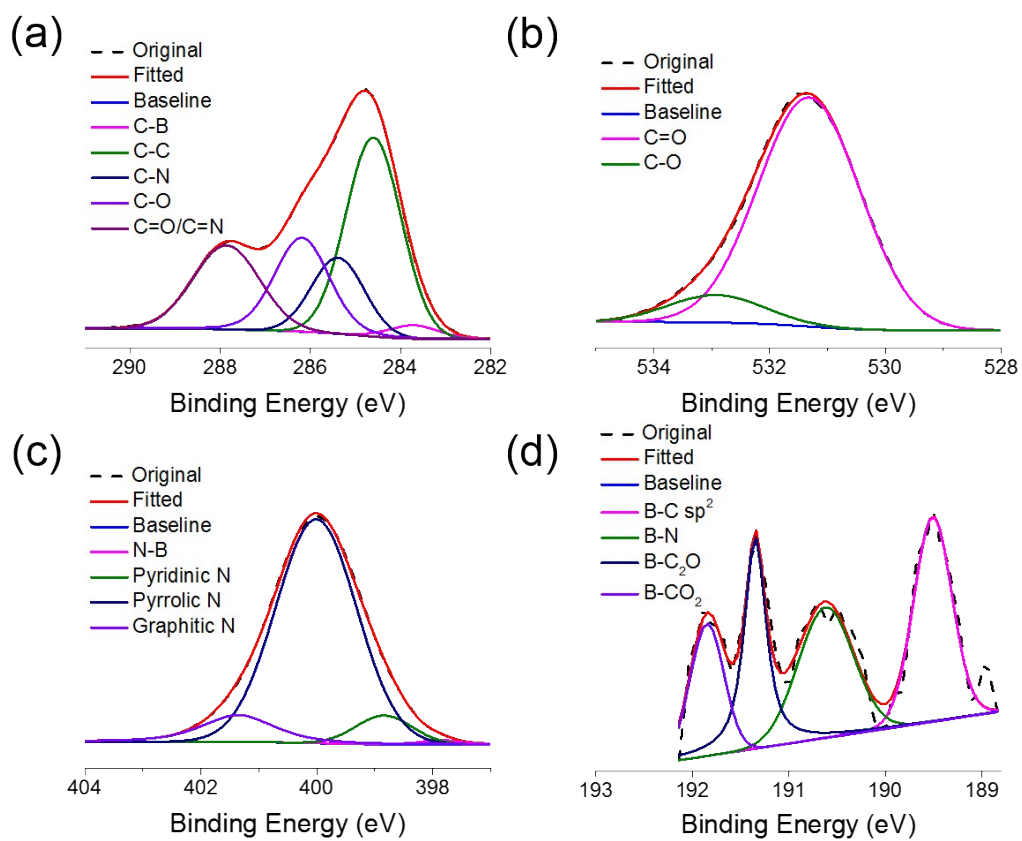

**Fig. S3** High-resolution XPS C 1s (a), O 1s (b), N 1s (c) and B 1s (d) peaks of BNCQD.

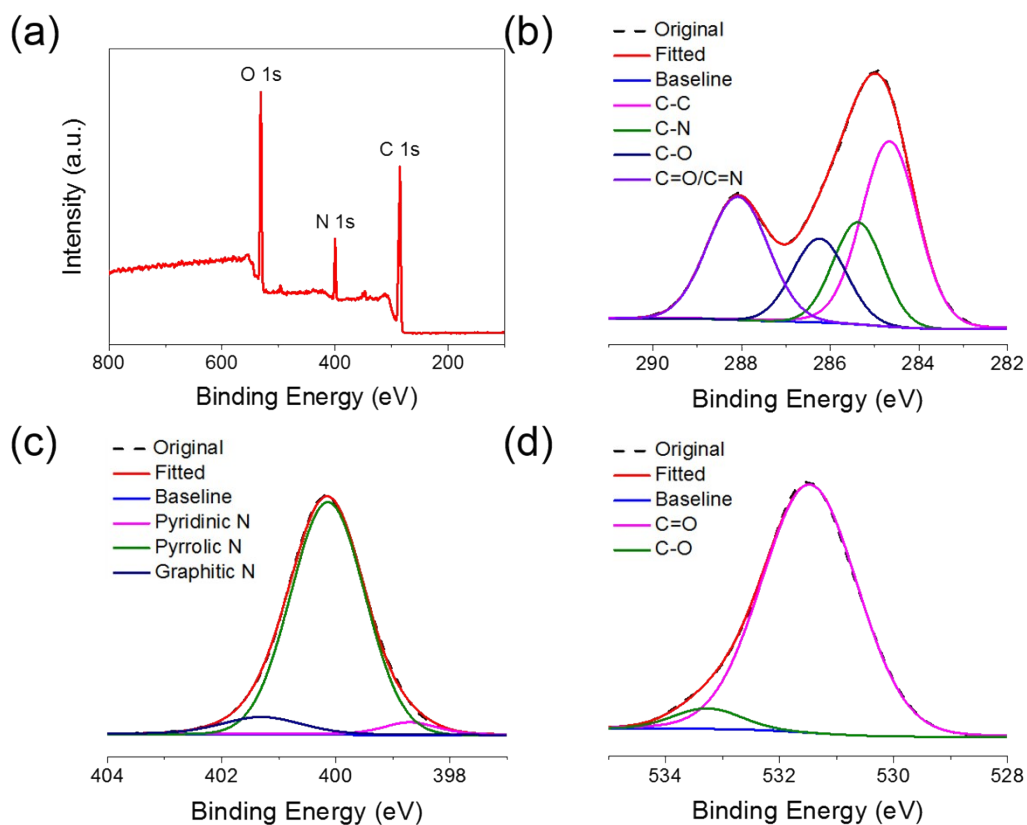

**Fig. S4** XPS survey spectra (a) and detailed high-resolution C 1s (b), N 1s (c) and O 1s (d) peaks of NCQD.

**Table S1.** Elementary composition of three different carbon quantum dots based on XPS measurement.

| Sample name                       | Carbon (at%) | Oxygen (at%) | Nitrogen (at%) | Boron (at%) |
|-----------------------------------|--------------|--------------|----------------|-------------|
| B <sub>1</sub> N <sub>2</sub> CQD | 67.02        | 19.75        | 13.04          | 0.20        |
| BNCQD                             | 68.44        | 19.12        | 12.33          | 0.11        |
| NCQD                              | 66.61        | 23.69        | 9.7            | -           |

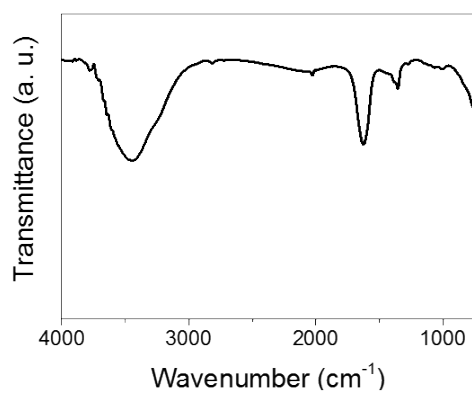

**Fig. S5** FTIR spectrum of BCQD

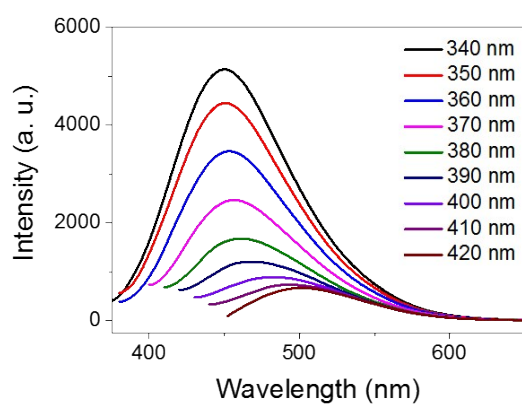

**Fig. S6** Steady-state fluorescence spectra of BNCQD under various excitation wavelengths.

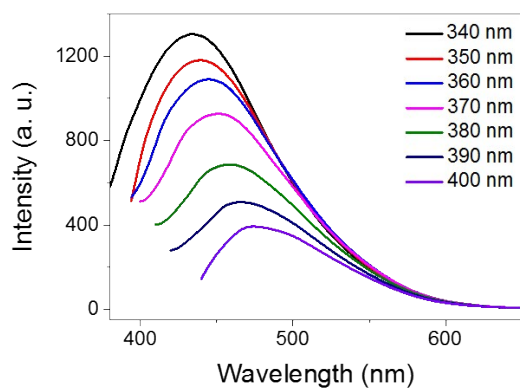

**Fig. S7** Steady-state fluorescence spectra of BCQD under various excitation wavelengths.

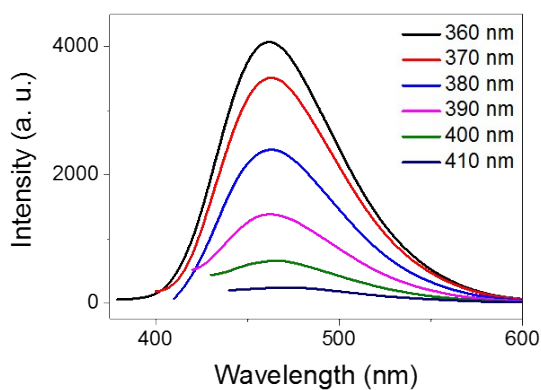

**Fig. S8** Steady-state fluorescence spectra of NCQD under various excitation wavelengths.

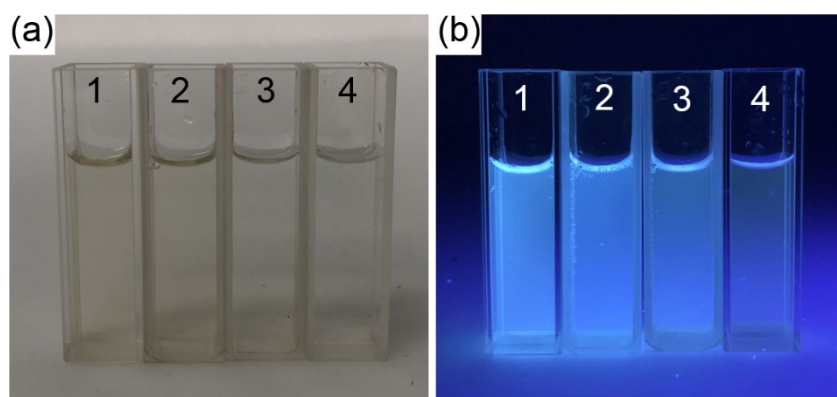

**Fig. S9** Photographs of CQDs in aqueous solution under visible light (a) and UV beam of 365 nm. From left to right are  $B_1N_2CQD$  (1),  $BNCQD$  (2),  $NCQD$  (3) and  $BCQD$  (4), respectively.

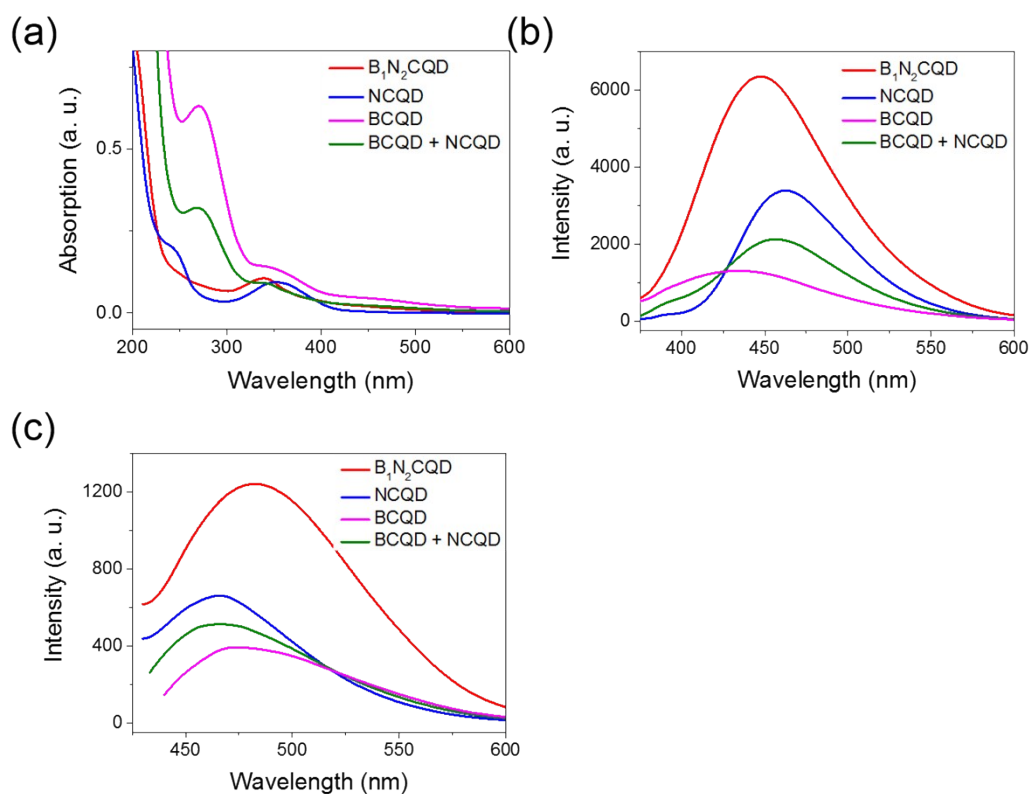

**Fig. S10** UV-Vis (a) and steady-state fluorescence (b, c) spectra of  $B_1N_2CQD$ ,  $NCQD$ ,  $BCQD$  and the mixture of  $BCQD$  and  $NCQD$ . (b) and (c) are excited at 340 and 400 nm, respectively. The mixture of  $BCQD$  and  $NCQD$  consist of 50%  $BCQD$  and 50%  $NCQD$ .

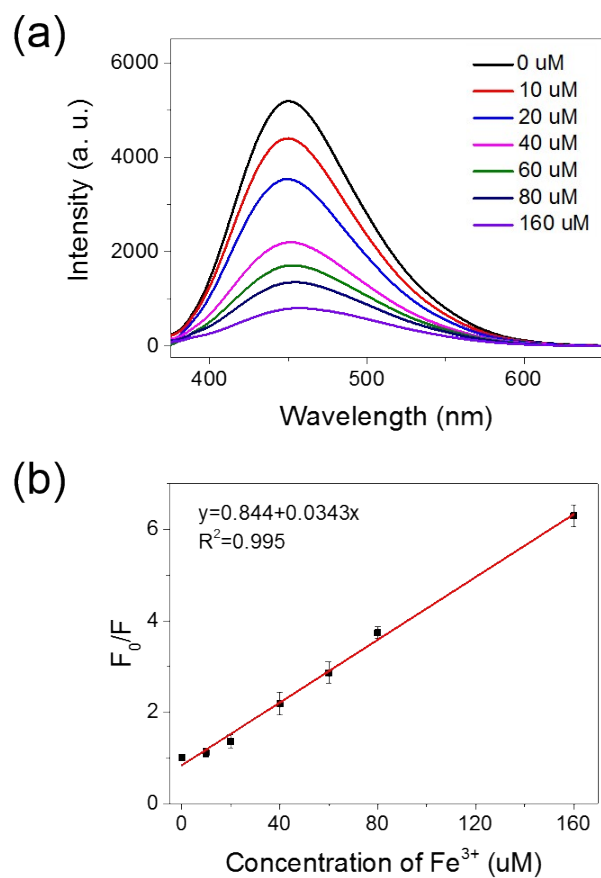

**Fig. S11** (a) Fluorescence spectra of BNCQD upon the addition of various concentrations of Fe<sup>3+</sup> from 0 to 160 uM. (b) Linear relationship between  $F_0/F$  and the concentration of Fe<sup>3+</sup>, where  $F_0$  and  $F$  are the emission intensity in the absence and presence of Fe<sup>3+</sup>, respectively.



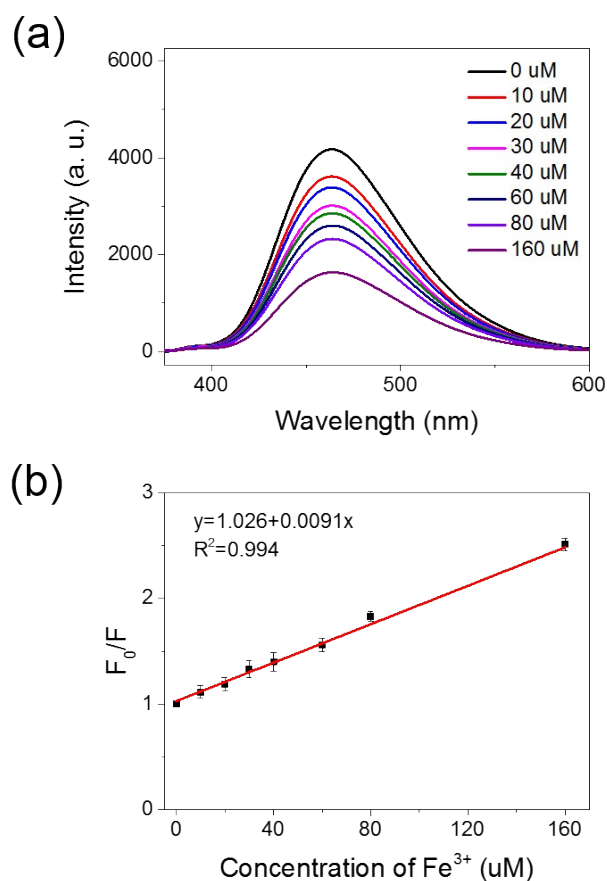

**Fig. S12** (a) Fluorescence spectra of NCQD upon the addition of various concentrations of Fe<sup>3+</sup> from 0 to 160 uM. (b) Linear relationship between  $F_0/F$  and the concentration of Fe<sup>3+</sup>, where  $F_0$  and  $F$  are the emission intensity in the absence and presence of Fe<sup>3+</sup>, respectively.

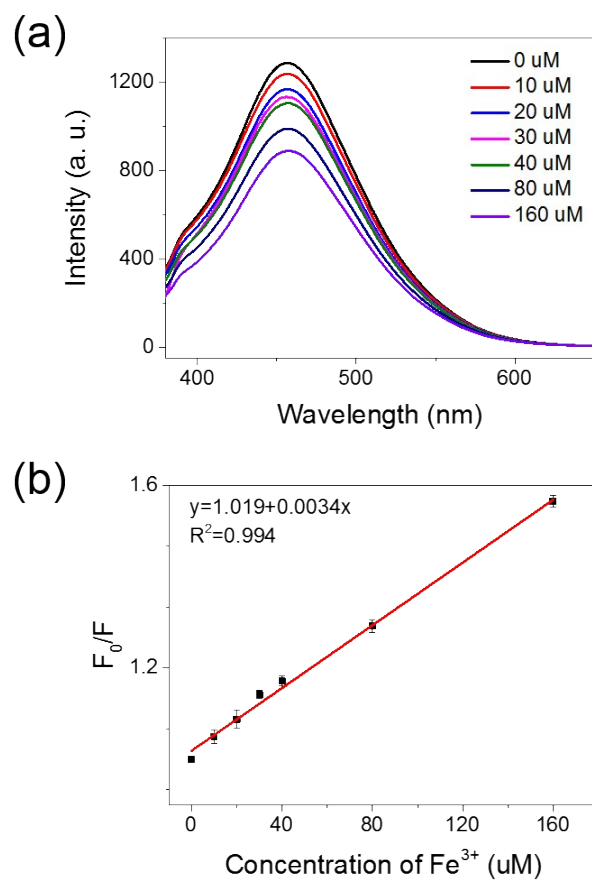

**Fig. S13** (a) Fluorescence spectra of BCQD upon the addition of various concentrations of  $\text{Fe}^{3+}$  from 0 to 160  $\mu\text{M}$ . (b) Linear relationship between  $F_0/F$  and the concentration of  $\text{Fe}^{3+}$ , where  $F_0$  and  $F$  are the emission intensity in the absence and presence of  $\text{Fe}^{3+}$ , respectively.

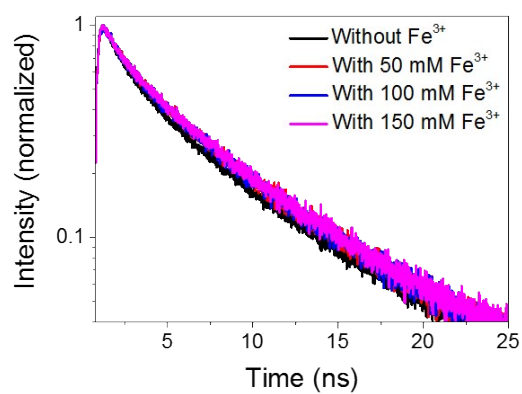

**Fig. S14** Time-resolved fluorescence decays for B<sub>1</sub>N<sub>2</sub>CQD after additions of various concentrations of Fe<sup>3+</sup>.

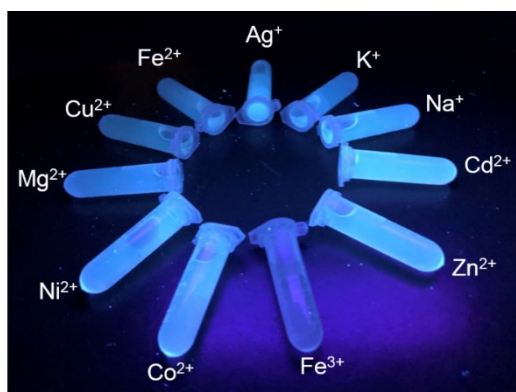

**Fig. S15** Photograph of B<sub>1</sub>N<sub>2</sub>CQD under 254 nm UV light irradiation after adding various kind of metal ions.

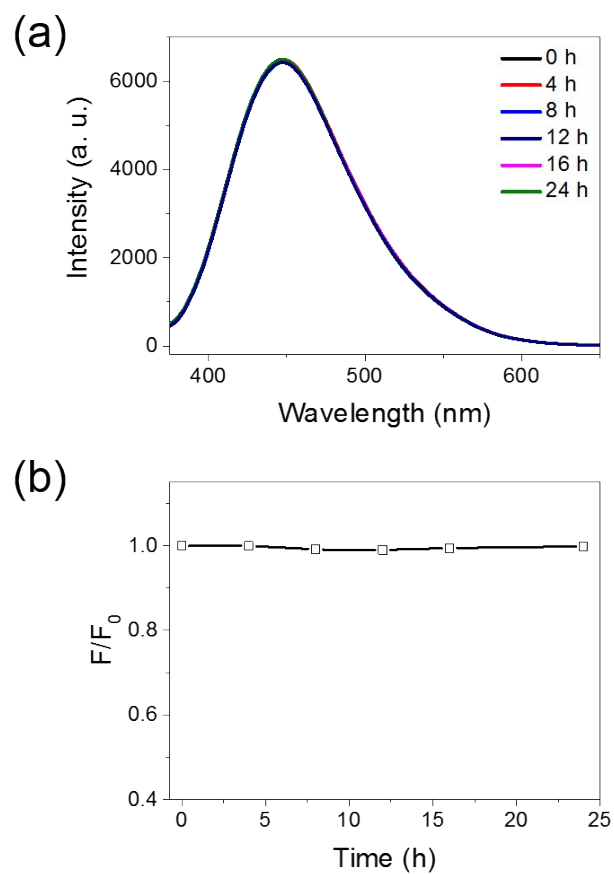

**Fig. S16** (a) Fluorescence spectra of B<sub>1</sub>N<sub>2</sub>CQD after 365 nm UV light irradiation. (b) Linear relationship between  $F/F_0$  and the irradiation time, where  $F_0$  and  $F$  are the emission intensity before and after UV light irradiation, respectively.

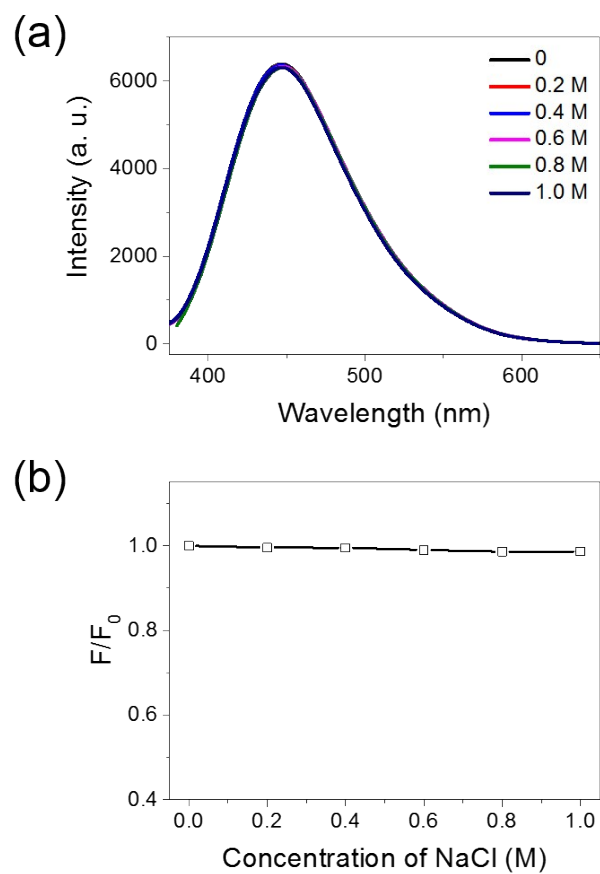

**Fig. S17** (a) Fluorescence spectra of B<sub>1</sub>N<sub>2</sub>CQD in the condition of various concentrations of NaCl from 0 to 1.0 M. (b) Linear relationship between  $F/F_0$  and the concentration of NaCl, where  $F_0$  and  $F$  are the emission intensity in the absence and presence of NaCl, respectively.

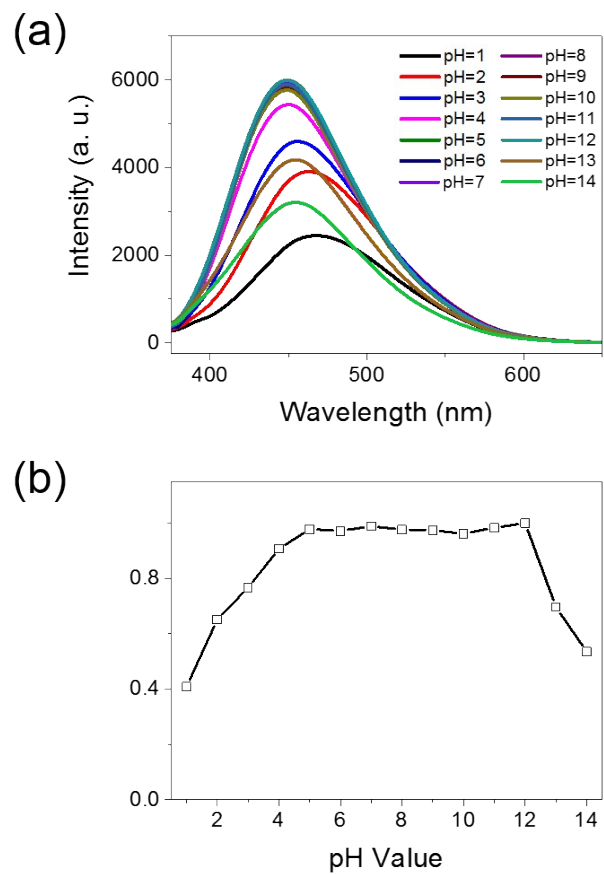

**Fig. S18** (a) Fluorescence spectra of B<sub>1</sub>N<sub>2</sub>CQD in various pH value from 1 to 14. (b) Normalized fluorescence intensity in different pH value.

**Table S2.** Comparison of CQDs-based sensors for Fe<sup>3+</sup> detection.

| Entry | Fluorescent Probes                | Carbon source                                | Linear range | LOD      | Reference |
|-------|-----------------------------------|----------------------------------------------|--------------|----------|-----------|
| 1     | BNCQDs                            | Ascorbic acid + 4-aminobenzeneboric acid     | 0-700 uM     | 7.5 uM   | 1         |
| 2     | N-doped CDs                       | Alginic acid + ethanediamine                 | 0-50 uM      | 10.98 uM | 2         |
| 3     | N-CDs                             | <i>Chionanthus retusus</i> fruit extract     | 0-2 uM       | 70 nM    | 3         |
| 4     | B-CDs                             | Glucose + boric acid                         | 0-16 uM      | 242 nM   | 4         |
| 5     | CDs                               | citric acid + 1,10-phenanthroline            | 0-50 uM      | 35 nM    | 5         |
| 6     | GN-CDs                            | Gallic acid + o-phenylenediamine             | 0-50 uM      | 800 nM   | 6         |
| 7     | CDs                               | Folic acid                                   | 0-400 uM     | 2 uM     | 7         |
| 8     | CDs                               | <i>Boswellia ovalifoliolata</i> bark extract | 0-500 uM     | 0.41 uM  | 8         |
| 9     | N-CQDs                            | Watermelon juice                             | 0-300 uM     | 160 nM   | 9         |
| 10    | C-QDs                             | Citric acid + Tris                           | 0-50 uM      | 1.3 uM   | 10        |
| 11    | B <sub>1</sub> N <sub>2</sub> CQD | citric acid + boric acid + ethylenediamine   | 0-160 uM     | 80 nM    | This work |

## Reference

1. L. Wang, J. S. Chung and S. H. Hur, *Dyes Pigm.*, 2019, **171**, 107752.
2. Y. Liu, Y. Liu, S.-J. Park, Y. Zhang, T. Kim, S. Chae, M. Park and H.-Y. Kim, *J. Mater. Chem. A*, 2015, **3**, 17747-17754.
3. R. Atchudan, T. N. J. I. Edison, D. Chakradhar, S. Perumal, J.-J. Shim and Y. R. Lee, *Sens. Actuators B: Chem.*, 2017, **246**, 497-509.
4. F. Wang, Q. Hao, Y. Zhang, Y. Xu and W. Lei, *Microchim. Acta*, 2016, **183**, 273-279.
5. A. Iqbal, Y. Tian, X. Wang, D. Gong, Y. Guo, K. Iqbal, Z. Wang, W. Liu and W. Qin, *Sens. Actuators B: Chem.*, 2016, **237**, 408-415.
6. S. Pang and S. Liu, *Anal. Chim. Acta*, 2020, **1105**, 155-161.
7. C. Shen, Y. Sun, J. Wang and Y. Lu, *Nanoscale*, 2014, **6**, 9139-9147.
8. G. Venkatesan, V. Rajagopalan and S. N. Chakravarthula, *J. Environ. Chem. Eng.*, 2019, **7**, 103013.
9. M. Lu, Y. Duan, Y. Song, J. Tan and L. Zhou, *J. Mol. Liq.*, 2018, **269**, 766-774.
10. M. Zhou, Z. Zhou, A. Gong, Y. Zhang and Q. Li, *Talanta*, 2015, **143**, 107-113.
